# Supplementary material for: Mutation of OsLPR3 Enhances Tolerance to Phosphate Starvation in Rice
Source: MDPI journal article supplement (doi:10.3390/ijms24032437), 2023-01-26
Supplement: s1 [file s1]

# Supplementary Figures

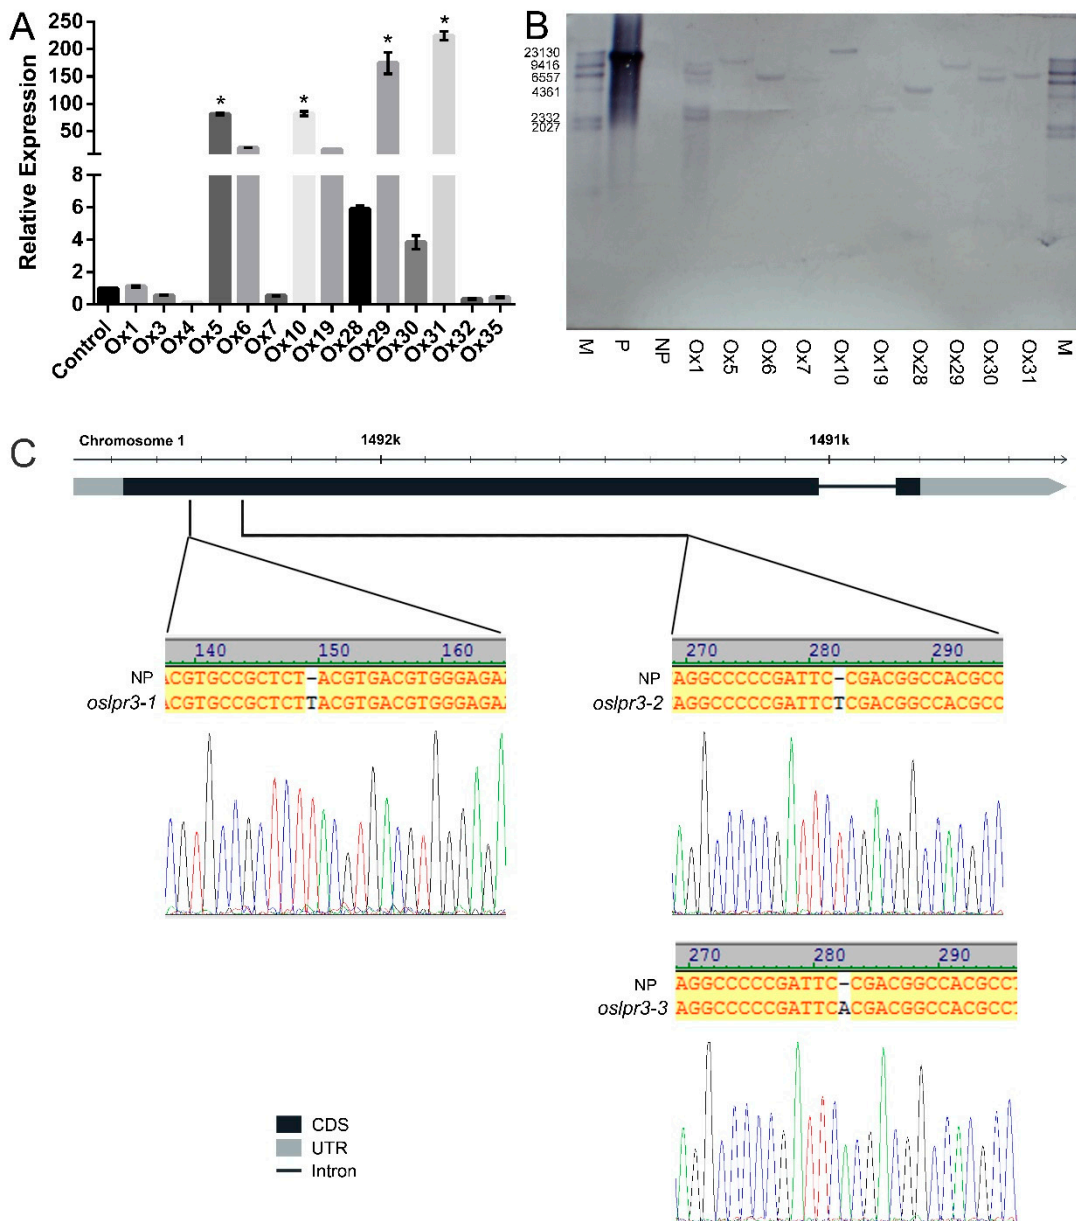

**Fig. S1. Identification of *OsLPR3* transgenic lines.**

WT and *OsLPR3* transgenic lines were grown hydroponically in +P medium for 2 weeks. (A) qRT-PCR assays were performed to determine the relative expression levels of *OsLPR3* transcripts in the roots. *OsActin* was used as an internal control. Values are means  $\pm$  SE ( $n = 3$ ). Different letters above the bars indicate significant differences ( $P < 0.05$ , one-way ANOVA). (B) Southern blot analysis of *OsLPR3* overexpression lines. (C) Total DNA of *oslpr3* mutants were isolated from leaf blade tissues and identified by sequencing. The *OsLPR3* gene structure is shown at the top. The coding sequence (CDS), untranslated regions (UTRs), and introns are indicated by black boxes, gray boxes, and a black bar, respectively. The mutation site of three independent knockout lines and a comparison of their nucleotide sequence to that of WT are shown. Below each sequence is a sequencing chromatograph for the *OsLPR3* mutant.

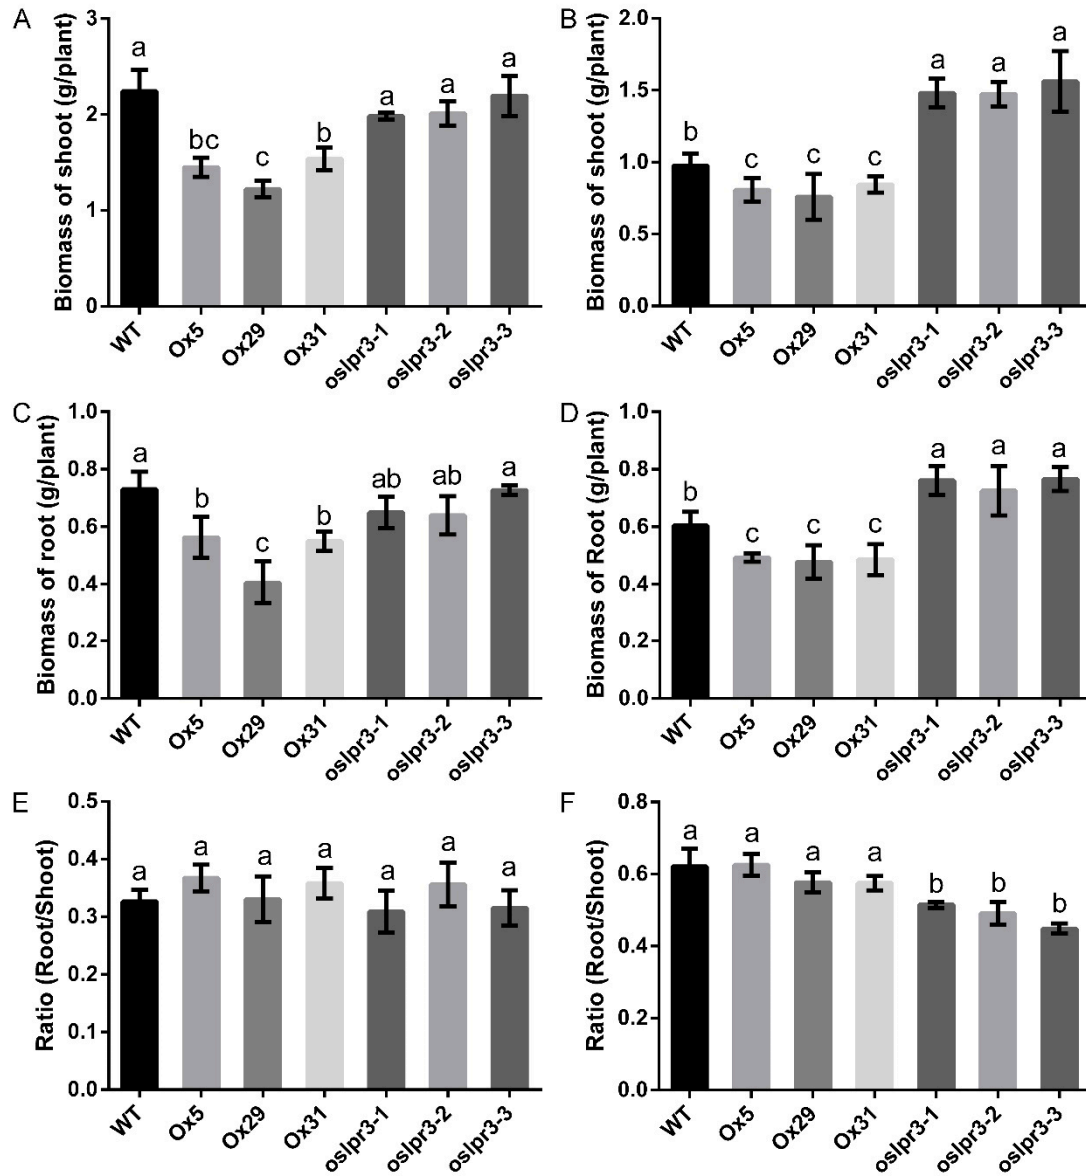

**Fig. S2.** Biomass and root–shoot ratio of WT, *OsLPR3*-Ox, and *oslpr3* knockout lines at different Pi supplies.

Seedlings were grown hydroponically as described in Fig. 3. Shoot biomass, root biomass, and root–shoot ratio under +P conditions (A, B, and C) and under –P conditions (D, E, and F). Values are means  $\pm$  SE ( $n = 6$ ). Different letters above the bars indicate significant differences ( $P < 0.05$ , one-way ANOVA).

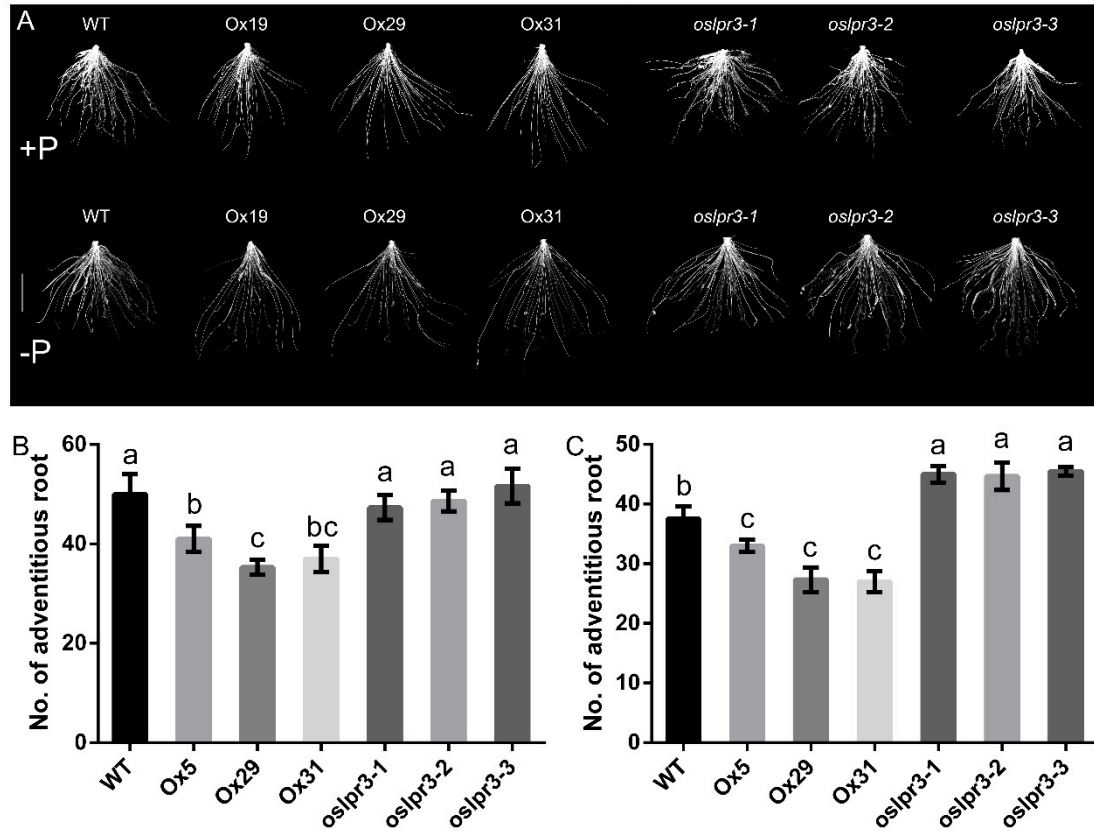

**Fig. S3. Altered *OsLPR3* expression affects the number of adventitious roots.**

Seedlings (10-d-old) of WT, *OsLPR3*-Ox, and *oslpr3* lines were grown hydroponically under +P and -P conditions for 21 d. (A) Root scans showing the root phenotypes of WT, *OsLPR3*-Ox, and *oslpr3* plants grown under +P conditions (top row) and -P conditions (bottom row). Scale bar = 5 cm. (B and C) Number of adventitious roots in WT, *OsLPR3*-Ox, and *oslpr3* lines under +P and -P conditions, respectively. Values are means  $\pm$  SE ( $n = 6$ ). Different letters above the bars indicate significant differences ( $P < 0.05$ , one-way ANOVA).

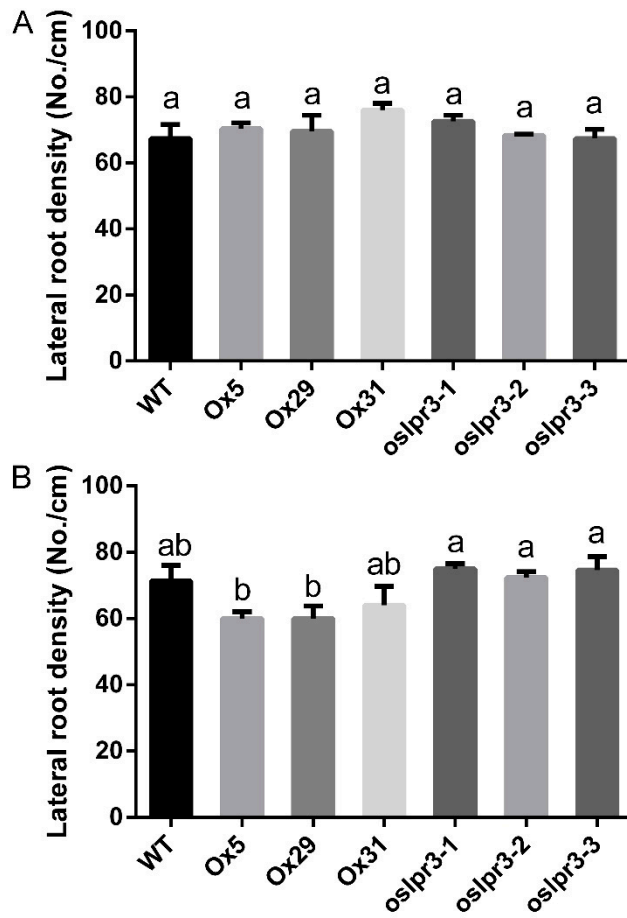

**Fig. S4.** Lateral root density of WT, *OsLPR3*-Ox, and *oslpr3* knockout lines at different Pi supplies. Seedlings were grown hydroponically as described in Fig.3. Lateral root density was measured under +P conditions (A) and -P conditions (B) using ImageJ. Values are means  $\pm$  SE ( $n = 6$ ). Different letters above the bars indicate significant differences ( $P < 0.05$ , one-way ANOVA).

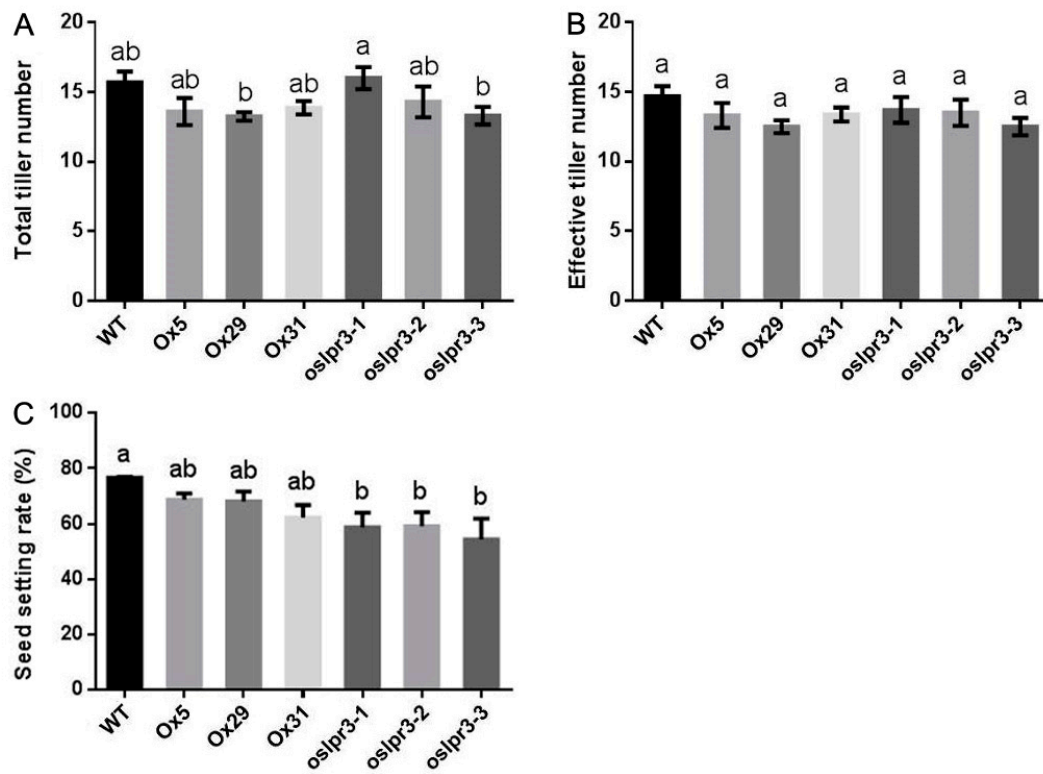

**Fig. S5. The affects of *OsLPR3* on tiller number and seed setting rate.**

WT, *OsLPR3*-Ox, and *oslpr3* lines were grown to maturity (20 weeks), total tiller number (A), effective tiller number (B) and seed setting rate (B) were determined. Values are means  $\pm$  SE ( $n = 10$ ). Different letters above the bars indicate significant differences ( $P < 0.05$ , one-way ANOVA).

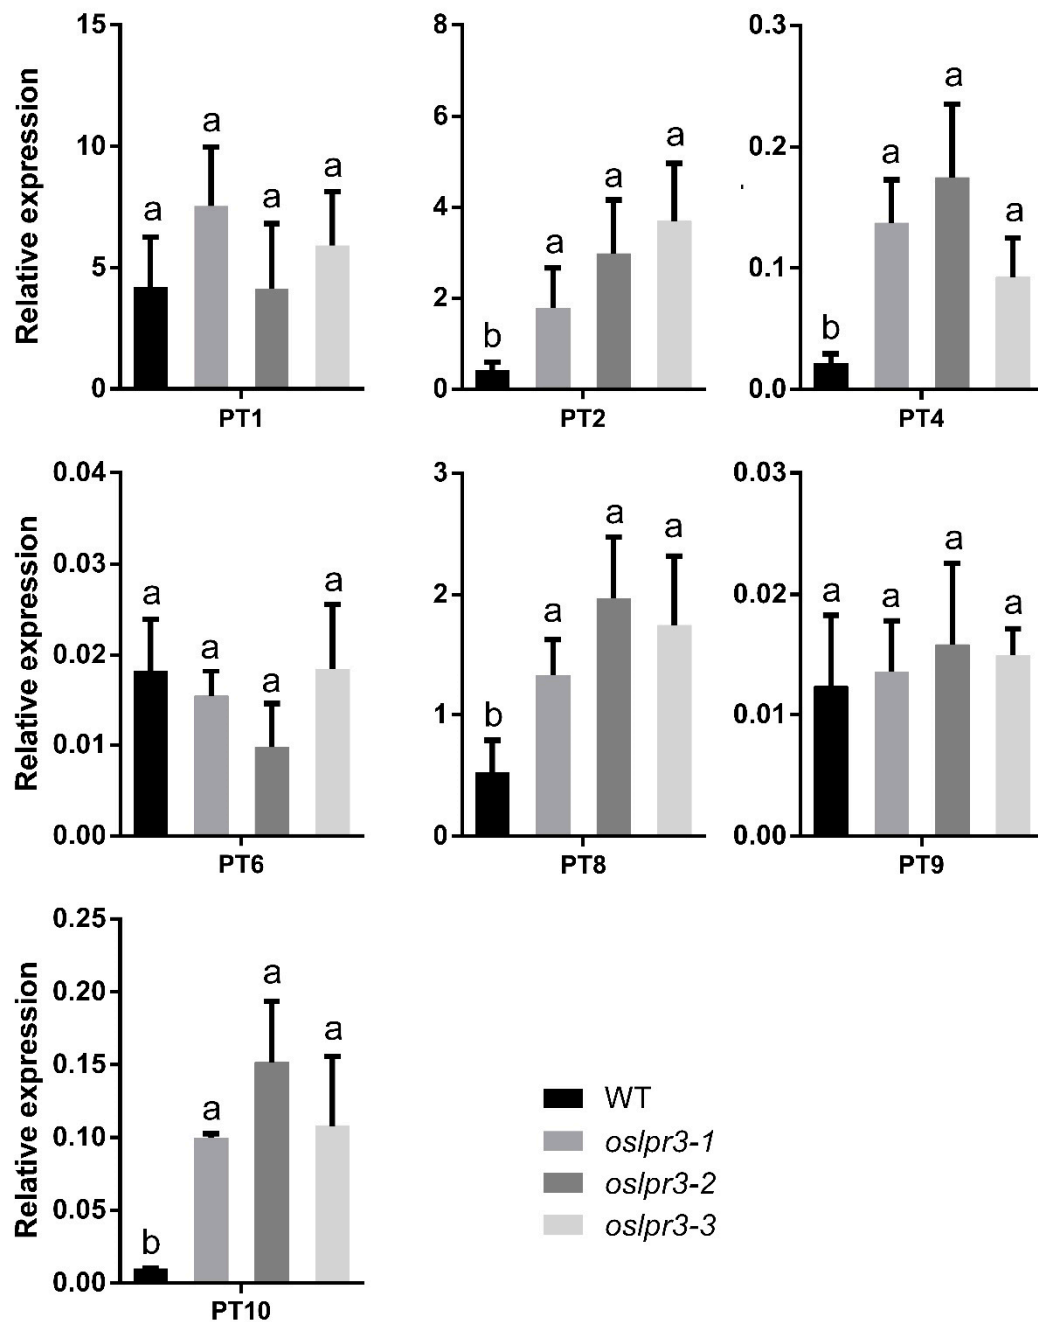

**Fig. S6. Expression of the seven members of the rice PHT family in wild-type (WT) and *oslpr3* mutant plants under +P conditions.**

Seedlings (10-d-old) of WT and *oslpr3* lines were grown hydroponically under +P conditions for 10 d. Relative OsPT transcript levels in the roots were determined and compared with *OsActin* by qPCR. Values are means  $\pm$  SE ( $n = 3$ ). Different letters above the bars indicate significant differences ( $P < 0.05$ , one-way ANOVA).

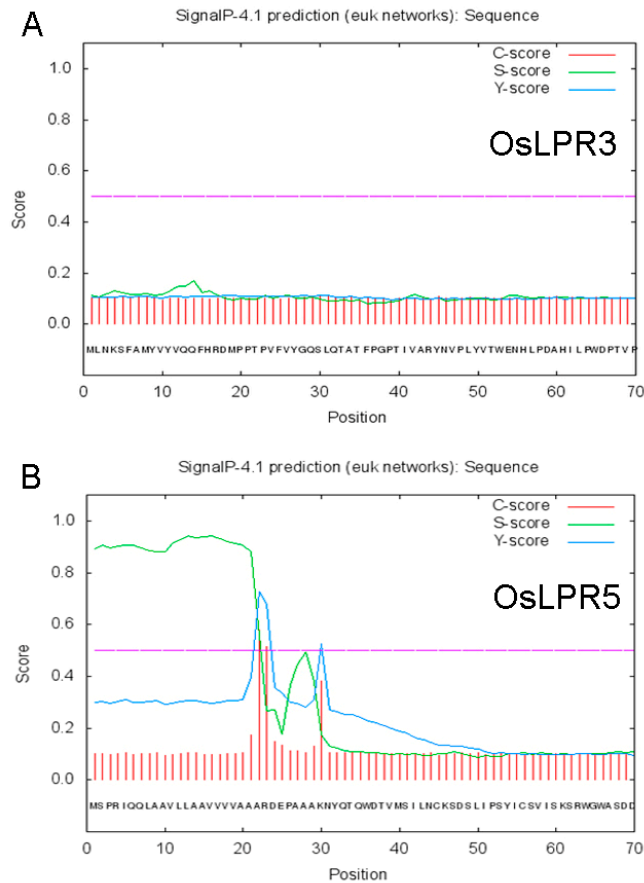

**Fig. S7. Signal peptide analysis of OsLPR3 and OsLPR5.**

Amino acid sequences of OsLPR3 (A) and OsLPR5 (B) were submitted to SignalP 4.1 ([www.cbs.dtu.dk/services/SignalP/](http://www.cbs.dtu.dk/services/SignalP/)). C-score was used to distinguish whether it was a clipping site, S-score was used to determine whether the corresponding location was a signal peptide region, and Y-score was the geometric mean of C-score and S-score, representing the combined cleavage site score.

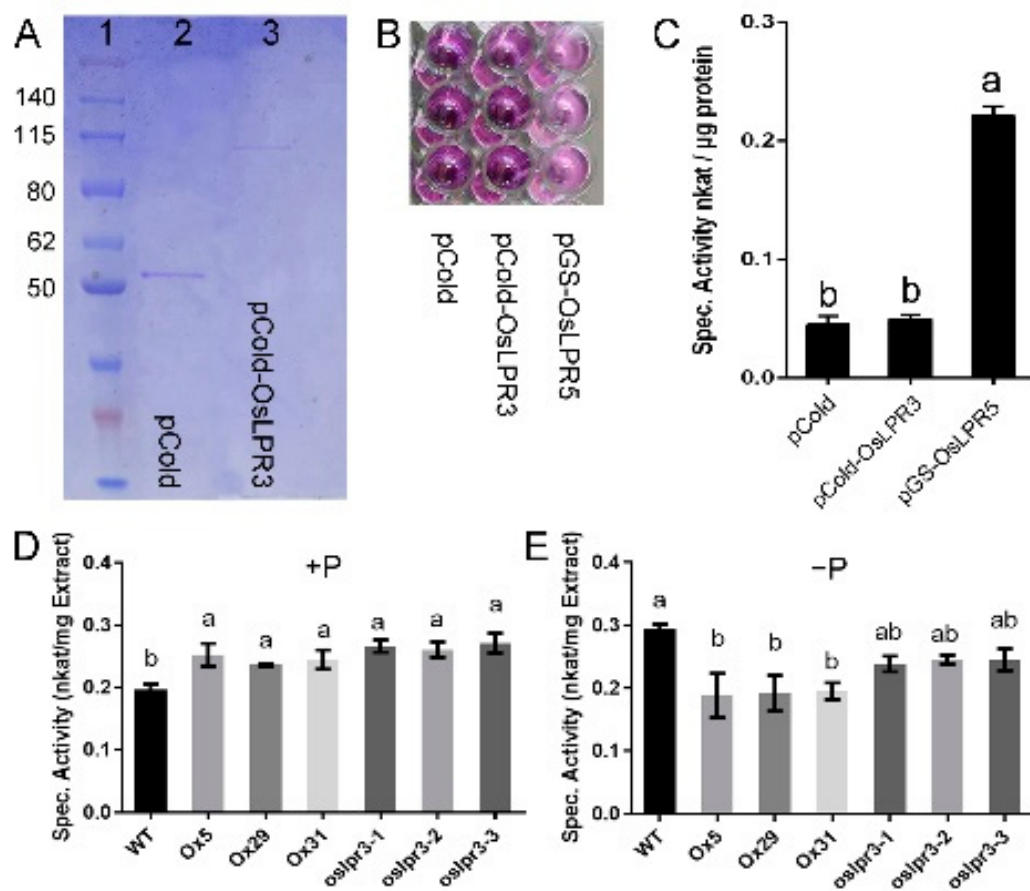

**Fig. S8. Ferroxidase activity analysis of OsLPR3.**

(A) Purified pCold-OsLPR3 fusion protein was expressed in *E. coli* strain BL21 (DE3) using the vector induced by IPTG and assayed by SDS-PAGE. Purified pGS-OsLPR5 fusion protein was used as a positive control. (B and C) Ferroxidase activity was assayed in the BL21 (DE3) strain transformed with pCold (negative control), pCold-OsLPR3, and pGS-OsLPR5 (positive control). (D and E) Ferroxidase activity was assayed in the roots of WT and *OsLPR3* overexpression lines (Ox5, Ox29, and Ox31) and *OsLPR3* knockout lines (*oslpr3-1*, *oslpr3-2*, and *oslpr3-3*) grown hydroponically under +P (D) and -P (E) conditions for 2 weeks.



Table S1. The primers used for overexpression, CRISPR, and qRT-PCR

| Gene                     | Sequences |                                         |
|--------------------------|-----------|-----------------------------------------|
| <i>OsActin</i> -qRT- PCR | F(5'-3')  | CAACACCCCTGCTATGTACG                    |
|                          | R(5'-3')  | CATCACCAGAGTCCAACACAA                   |
| <i>OsLPR3</i> -qRT- PCR  | F(5'-3')  | TGCATGGTTGTCTCCATTCG                    |
|                          | R(5'-3')  | CAAGGCAAACGTACAACAAAGG                  |
| <i>OsIPS1</i> -qRT- PCR  | F(5'-3')  | TTGGCAATTATTCGGTGGAT                    |
|                          | R(5'-3')  | ACCATTTACCATCCTCTTTATG                  |
| <i>OsPAP10</i> -qRT- PCR | F(5'-3')  | ATACTGGCAGCCGACGGATGA                   |
|                          | R(5'-3')  | GAGGGAGCTGGAGCGGAGAA                    |
| <i>OsSQD2</i> -qRT- PCR  | F(5'-3')  | CTGAAAACGGTAATGGATAGG                   |
|                          | R(5'-3')  | AACAACAACAGCACGAGC                      |
| <i>OsPT1</i> -qRT- PCR   | F(5'-3')  | CGCTTCCGTACGAGTGGTAGT                   |
|                          | R(5'-3')  | GGTTCTTTCAAATCCAGGGAAA                  |
| <i>OsPT2</i> -qRT- PCR   | F(5'-3')  | GACGAGACCGCCCAAGAAG                     |
|                          | R(5'-3')  | TTTTCAGTCACTCACGTCGAGAC                 |
| <i>OsPT4</i> -qRT- PCR   | F(5'-3')  | TTCTGCTAGTGTACCAAACAAAATTACA            |
|                          | R(5'-3')  | GTAAGTGGCATTTATAATATCAACAGTAACC         |
| <i>OsPT6</i> -qRT- PCR   | F(5'-3')  | CCGCCCCTGCAAACCTGTA                     |
|                          | R(5'-3')  | GAAGTGGCGGTTTCTTCGAT                    |
| <i>OsPT8</i> -qRT- PCR   | F(5'-3')  | AGAAGGCAAAAGAAATGTGTGTTAAAT             |
|                          | R(5'-3')  | AAAATGTATTCGTGCCAAATTGCT                |
| <i>OsPT9</i> -qRT- PCR   | F(5'-3')  | AGAAAAACATAGGCTTGTCATCCTTT              |
|                          | R(5'-3')  | AAAACCTAAGAAGCACTGTAAATAAATCC           |
| <i>OsPT10</i> -qRT- PCR  | F(5'-3')  | ATGTCGCCCATCCTTCCA                      |
|                          | R(5'-3')  | TCGCTTTCCGACGATGATC                     |
| <i>35s::OsLPR3</i>       | F(5'-3')  | AACGATAGGAGCTCGGTACCTCATGGTCAAGCCTCGTTT |
|                          | R(5'-3')  | AGGTCGACTCTAGAGGATCCGGGATCACAAGGCAAACGT |
| <i>OsLPR3-CRISPR-S1</i>  | F(5'-3')  | GGCATTTCTCCACGTCACGTAGAG                |
|                          | R(5'-3')  | AAACCTCTACGTGACGTGGGAGAA                |
| <i>OsLPR3-CRISPR-S2</i>  | F(5'-3')  | GGCAGCCCAGGCCCCCGATTCCGA                |
|                          | R(5'-3')  | AAACTCGGAATCGGGGGCCTGGGC                |
